# Supplementary material
Source: publisher site journal article supplement (https://www.spandidos-publications.com/35/downloadSupplementary)
Supplement: Supplementary file 1 [file downloadSupplementary]

Figure S1. Prediction of the forest for different values of N% and AMW.

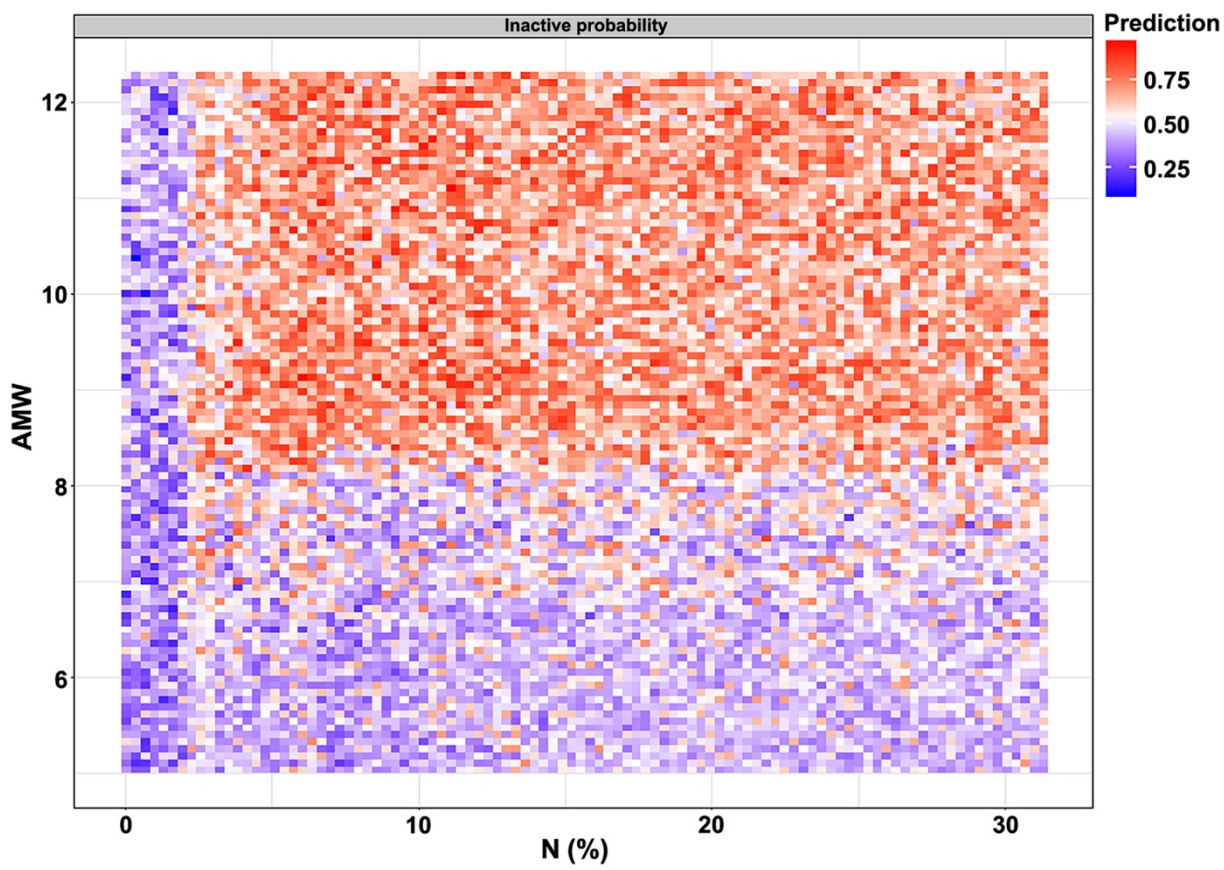

Figure S2. Prediction of the forest for different values of N% and nTA.

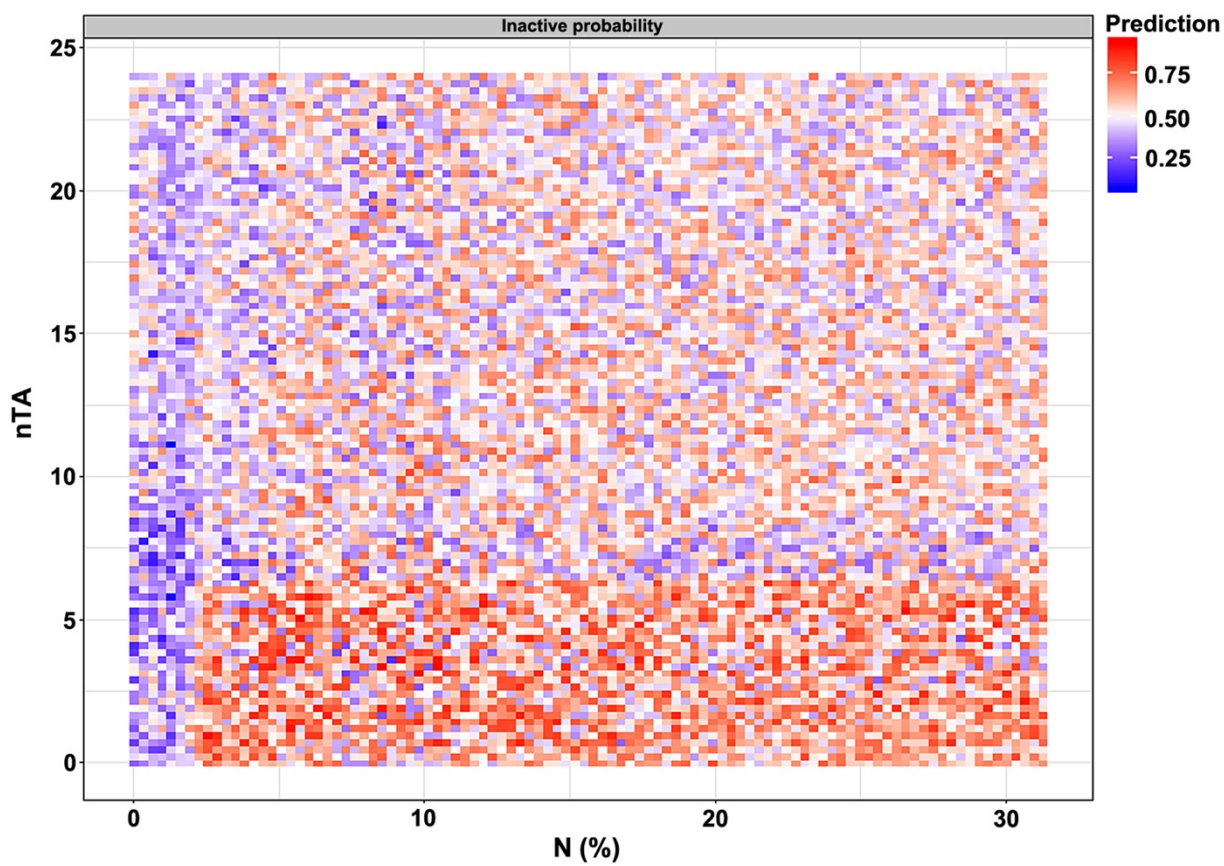

Figure S3. Prediction of the forest for different values of MCD and ARR.

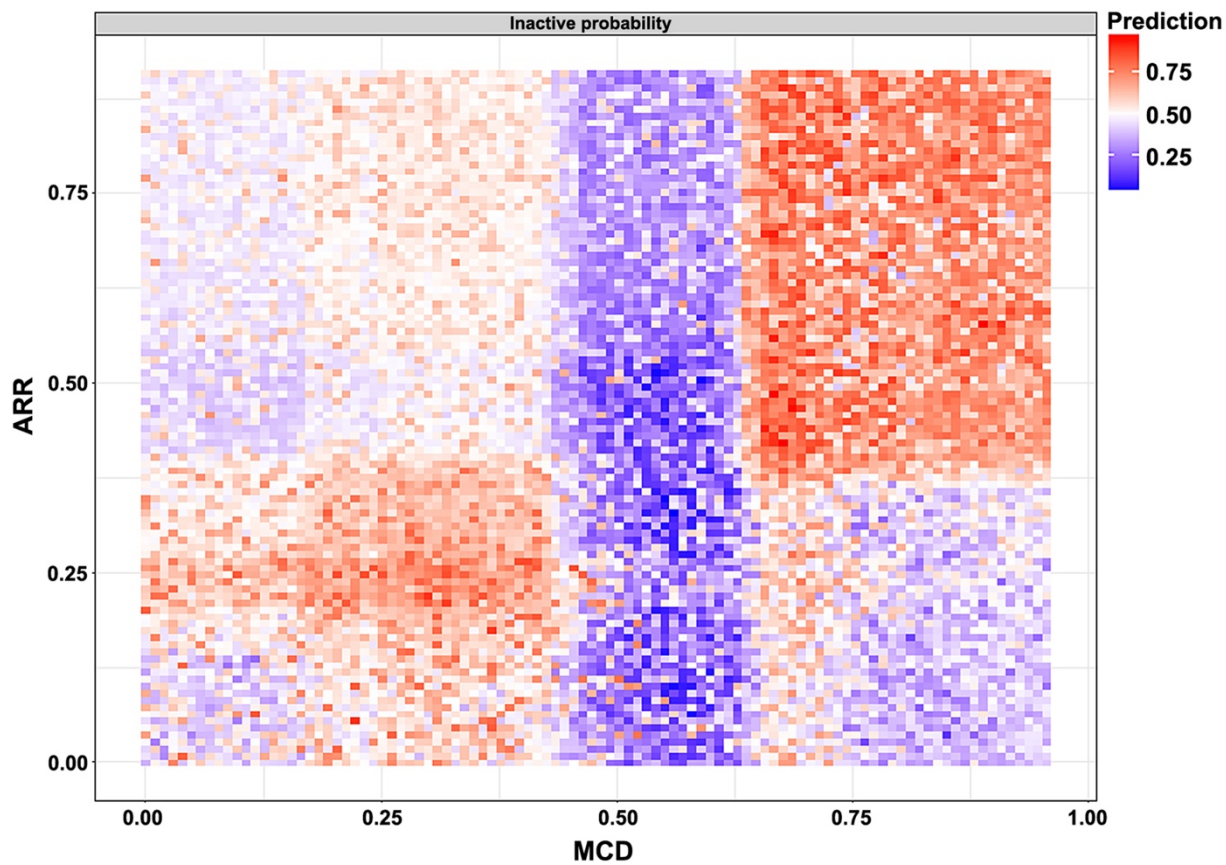

Table S1. Performance of selected classification models with positive predictive value (PPV) higher than 75% for the 10-fold nested cross-validation.

|     | Model                                               | Specificity | Sensitivity | PPV <sup>d</sup> | Balanced accuracy | MMCE   |
|-----|-----------------------------------------------------|-------------|-------------|------------------|-------------------|--------|
| 1.  | Topological descriptors – RF* (1) <sup>a</sup>      | 0.9374      | 0.3583      | 0.8424           | 0.6479            | 0.3022 |
| 2.  | Topological descriptors – RF (2)                    | 0.9298      | 0.3628      | 0.7964           | 0.6463            | 0.3105 |
| 3.  | Topological descriptors – RF (1) over <sup>b</sup>  | 0.9148      | 0.5752      | 0.8749           | 0.745             | 0.2548 |
| 4.  | Topological descriptors – RF (1) smote <sup>c</sup> | 0.8946      | 0.499       | 0.8158           | 0.6968            | 0.3086 |
| 5.  | Walk and path – RF (1)                              | 0.9465      | 0.285       | 0.7587           | 0.6158            | 0.3231 |
| 6.  | Information indices – RF (1)                        | 0.9486      | 0.3434      | 0.8368           | 0.646             | 0.3003 |
| 7.  | Information indices – RF (2)                        | 0.9685      | 0.3448      | 0.8848           | 0.6566            | 0.2878 |
| 8.  | Information indices – RF (1) over                   | 0.9022      | 0.634       | 0.8715           | 0.7681            | 0.2319 |
| 9.  | Information indices – RF (1) smote                  | 0.9023      | 0.5438      | 0.851            | 0.723             | 0.2776 |
| 10. | Information indices – BST** (1) smote               | 0.78        | 0.7536      | 0.7803           | 0.7668            | 0.2344 |
| 11. | 2D-autocorrelation - RF (1)                         | 0.927       | 0.3414      | 0.776            | 0.6342            | 0.3063 |
| 12. | 2D-autocorrelation - RF (2)                         | 0.9687      | 0.3005      | 0.8707           | 0.6346            | 0.3063 |
| 13. | 2D-autocorrelation - RF (2) over                    | 0.9453      | 0.611       | 0.9201           | 0.7782            | 0.2289 |
| 14. | 2D-autocorrelation - RF (2) smote                   | 0.9174      | 0.4858      | 0.8583           | 0.7016            | 0.2993 |
| 15. | Burden eigenvalues – RF (2)                         | 0.941       | 0.3373      | 0.7943           | 0.6391            | 0.3063 |
| 16. | Burden eigenvalues – RF (2) over                    | 0.8803      | 0.6373      | 0.8417           | 0.7588            | 0.2427 |
| 17. | Burden eigenvalues – RF (2) smote                   | 0.8445      | 0.6265      | 0.8057           | 0.7355            | 0.2641 |
| 18. | P-VSA-like – RF (1)                                 | 0.9327      | 0.3528      | 0.7825           | 0.6428            | 0.3058 |
| 19. | P-VSA-like – RF (2)                                 | 0.9332      | 0.3716      | 0.7996           | 0.6524            | 0.2967 |
| 20. | P-VSA-like – RF (2) over                            | 0.9149      | 0.6159      | 0.8891           | 0.7654            | 0.2369 |
| 21. | P-VSA-like – RF (2) smote                           | 0.8919      | 0.5541      | 0.8273           | 0.723             | 0.283  |
| 22. | Eta indices – RF (2)                                | 0.9384      | 0.3807      | 0.8394           | 0.6596            | 0.2872 |
| 23. | Edge adjacency – RF (1)                             | 0.9412      | 0.3453      | 0.8242           | 0.6432            | 0.307  |
| 24. | Edge adjacency – RF (2)                             | 0.9301      | 0.3652      | 0.8006           | 0.6477            | 0.3038 |
| 25. | Edge adjacency – RF (1) over                        | 0.9031      | 0.6477      | 0.8635           | 0.7754            | 0.2239 |
| 26. | Edge adjacency – SVM*** (2) over                    | 0.7663      | 0.7113      | 0.7519           | 0.7388            | 0.2696 |
| 27. | Global – BST (1) over                               | 0.793       | 0.8137      | 0.7899           | 0.8034            | 0.1994 |
| 28. | Global – BST (1) smote                              | 0.7974      | 0.7957      | 0.7927           | 0.7966            | 0.202  |

\*RF – random forest classifier; \*\*BST – gradient boosting classifier; \*\*\* SVM – support vector machines; <sup>a</sup> numbers in brackets indicate the subset of features selected by the different feature selection algorithms (1 – random forest importance and information gain; 2 – symmetrical uncertainty); <sup>b</sup>over - training set balanced through oversampling; <sup>c</sup>smote – training set balanced through the smote technique (*synthetic minority oversampling technique*). <sup>d</sup>PPV – positive predictive value. The first in the name of each model indicates the block of descriptors used for its building.

Table S2. Performance of all classification models for the external validation set (different descriptor blocks, sampling techniques, and classification algorithms).

| <b>Model</b>                              | <b>Specificity</b> | <b>Sensitivity</b> | <b>PPV</b> | <b>Balanced accuracy</b> | <b>MMCE</b> |
|-------------------------------------------|--------------------|--------------------|------------|--------------------------|-------------|
| Constitutional indices - RF               | 0.9516             | 0.4546             | 0.8696     | 0.7031                   | 0.2547      |
| Constitutional indices – RF over          | 0.7903             | 0.500              | 0.6286     | 0.6452                   | 0.3302      |
| Constitutional indices – RF smote         | 0.8387             | 0.500              | 0.6875     | 0.6694                   | 0.3019      |
| Constitutional indices - BST              | 0.7419             | 0.5227             | 0.5897     | 0.6323                   | 0.3491      |
| Constitutional indices – BST over         | 0.7742             | 0.5227             | 0.6216     | 0.6485                   | 0.3302      |
| Constitutional indices – BST smote        | 0.6774             | 0.6364             | 0.5833     | 0.6569                   | 0.3396      |
| Constitutional indices - SVM              | 0.8065             | 0.6136             | 0.6923     | 0.7100                   | 0.2736      |
| Constitutional indices – SVM over         | 0.6613             | 0.7045             | 0.5962     | 0.6829                   | 0.3208      |
| Constitutional indices – SVM over         | 0.7742             | 0.6591             | 0.6744     | 0.7166                   | 0.2736      |
| Constitutional indices – knn              | 0.8065             | 0.5682             | 0.6757     | 0.6873                   | 0.2925      |
| Constitutional indices – knn over         | 0.6935             | 0.7045             | 0.6200     | 0.6990                   | 0.3019      |
| Constitutional indices – knn smote        | 0.6613             | 0.6364             | 0.5714     | 0.6488                   | 0.3491      |
| Ring descriptors – RF(1)                  | 0.8871             | 0.4318             | 0.7308     | 0.6595                   | 0.3019      |
| Ring descriptors – RF(2)                  | 0.8548             | 0.3636             | 0.6400     | 0.6092                   | 0.3491      |
| Ring descriptors – RF(1) over             | 0.8871             | 0.4545             | 0.7407     | 0.6708                   | 0.2925      |
| Ring descriptors – RF(1) smote            | 0.8226             | 0.4773             | 0.6562     | 0.6499                   | 0.3208      |
| Ring descriptors – BST (1)                | 0.7581             | 0.5455             | 0.6154     | 0.6518                   | 0.3302      |
| Ring descriptors – BST (2)                | 0.7903             | 0.6136             | 0.6750     | 0.7020                   | 0.2830      |
| Ring descriptors – BST (1) over           | 0.7903             | 0.5682             | 0.6579     | 0.6793                   | 0.3019      |
| Ring descriptors – BST (1) smote          | 0.7258             | 0.6591             | 0.6304     | 0.6924                   | 0.3019      |
| Ring descriptors – SVM (1)                | 0.8065             | 0.3864             | 0.5862     | 0.5964                   | 0.3679      |
| Ring descriptors – SVM (2)                | 0.7903             | 0.6136             | 0.6750     | 0.7020                   | 0.2830      |
| Ring descriptors – SVM (1) over           | 0.6290             | 0.7045             | 0.5741     | 0.6668                   | 0.3396      |
| Ring descriptors – SVM (1) smote          | 0.6935             | 0.6136             | 0.5870     | 0.6536                   | 0.3396      |
| Ring descriptors – SVM (2) smote          | 0.6290             | 0.7500             | 0.5893     | 0.6895                   | 0.3208      |
| Ring descriptors – knn (1)                | 0.7581             | 0.5000             | 0.5946     | 0.6290                   | 0.3491      |
| Ring descriptors – knn (2)                | 0.7742             | 0.5227             | 0.6216     | 0.6485                   | 0.3302      |
| Ring descriptors – knn (1) over           | 0.6290             | 0.7500             | 0.5893     | 0.6895                   | 0.3208      |
| Ring descriptors – knn (1) smote          | 0.7581             | 0.5000             | 0.5946     | 0.6290                   | 0.3491      |
| Topological descriptors – RF (1)          | 0.9194             | 0.5000             | 0.8148     | 0.7097                   | 0.2547      |
| Topological descriptors – RF (2)          | 0.9194             | 0.5227             | 0.8214     | 0.7210                   | 0.2453      |
| Topological descriptors – RF (1) over     | 0.9355             | 0.5682             | 0.8621     | 0.7518                   | 0.2170      |
| Topological descriptors – RF (1) smote    | 0.9516             | 0.5909             | 0.8966     | 0.7713                   | 0.1981      |
| Topological descriptors – BST (1)         | 0.8871             | 0.7045             | 0.8158     | 0.7958                   | 0.1887      |
| Topological descriptors – BST (2)         | 0.8065             | 0.6364             | 0.7000     | 0.7214                   | 0.2642      |
| Topological descriptors – BST (1) (over)  | 0.7903             | 0.7955             | 0.7292     | 0.7929                   | 0.2075      |
| Topological descriptors – BST (1) (smote) | 0.9194             | 0.6818             | 0.8571     | 0.8006                   | 0.1793      |
| Topological descriptors – SVM (1)         | 0.8871             | 0.6818             | 0.8108     | 0.7845                   | 0.1981      |
| Topological descriptors – SVM (2)         | 0.8710             | 0.6364             | 0.7778     | 0.7537                   | 0.2264      |
| Topological descriptors – SVM (1) over    | 0.8065             | 0.7500             | 0.7333     | 0.7782                   | 0.2170      |
| Topological descriptors – SVM (1) smote   | 0.7742             | 0.7500             | 0.7021     | 0.7621                   | 0.2358      |
| Topological descriptors – knn (1)         | 0.8548             | 0.6591             | 0.7632     | 0.7570                   | 0.2264      |
| Topological descriptors – knn (2)         | 0.8548             | 0.5455             | 0.7273     | 0.7001                   | 0.2736      |
| Topological descriptors – knn (1) over    | 0.8548             | 0.6591             | 0.7632     | 0.7570                   | 0.2264      |

| <b>Model</b>                            | <b>Specificity</b> | <b>Sensitivity</b> | <b>PPV</b> | <b>Balanced accuracy</b> | <b>MMCE</b> |
|-----------------------------------------|--------------------|--------------------|------------|--------------------------|-------------|
| Topological descriptors – knn (1) smote | 0.8387             | 0.6591             | 0.7436     | 0.7489                   | 0.2358      |
| Walk and path – RF (1)                  | 0.9516             | 0.2727             | 0.8000     | 0.6122                   | 0.3302      |
| Walk and path – RF (1) over             | 0.6774             | 0.6818             | 0.6000     | 0.6796                   | 0.3208      |
| Walk and path – RF (1) smote            | 0.6613             | 0.6818             | 0.5882     | 0.6716                   | 0.3302      |
| Walk and path – BST (1)                 | 0.7742             | 0.5455             | 0.6316     | 0.6598                   | 0.3208      |
| Walk and path – BST (1) over            | 0.7097             | 0.6591             | 0.6170     | 0.6844                   | 0.3113      |
| Walk and path – BST (1) smote           | 0.8548             | 0.5455             | 0.7273     | 0.7001                   | 0.2736      |
| Walk and path – SVM (1)                 | 0.9194             | 0.3409             | 0.7500     | 0.6301                   | 0.3208      |
| Walk and path – SVM (1) over            | 0.6774             | 0.7500             | 0.6226     | 0.7137                   | 0.2925      |
| Walk and path – SVM (1) smote           | 0.6774             | 0.7500             | 0.6226     | 0.7137                   | 0.2925      |
| Walk and path – knn (1)                 | 0.7742             | 0.5227             | 0.5610     | 0.6162                   | 0.3679      |
| Walk and path – knn (1) over            | 0.7097             | 0.5227             | 0.5610     | 0.6162                   | 0.3679      |
| Walk and path – knn (1) smote           | 0.7581             | 0.6591             | 0.6591     | 0.7086                   | 0.2830      |
| Information indices – RF (1)            | 1.0000             | 0.5000             | 1.0000     | 0.7500                   | 0.2075      |
| Information indices – RF (2)            | 0.9839             | 0.5227             | 0.9583     | 0.7533                   | 0.2076      |
| Information indices – RF (1) over       | 1.0000             | 0.5227             | 1.0000     | 0.7614                   | 0.1981      |
| Information indices – RF (1) smote      | 1.0000             | 0.5682             | 1.0000     | 0.7841                   | 0.1792      |
| Information indices – BST (1)           | 0.9355             | 0.6818             | 0.8824     | 0.8086                   | 0.1698      |
| Information indices – BST (2)           | 0.9677             | 0.6136             | 0.9310     | 0.7907                   | 0.1792      |
| Information indices – BST (1) over      | 0.9355             | 0.7954             | 0.8974     | 0.8655                   | 0.1226      |
| Information indices – BST (1) smote     | 0.9355             | 0.7500             | 0.8919     | 0.8427                   | 0.1415      |
| Information indices – SVM (1)           | 0.9516             | 0.3864             | 0.8500     | 0.6690                   | 0.2830      |
| Information indices – SVM (2)           | 0.9194             | 0.2954             | 0.7222     | 0.6074                   | 0.3396      |
| Information indices – SVM (1) over      | 0.7742             | 0.5455             | 0.6316     | 0.6598                   | 0.3208      |
| Information indices – SVM (1) smote     | 0.6452             | 0.6364             | 0.5600     | 0.6408                   | 0.3585      |
| Information indices – knn (1)           | 0.9023             | 0.3864             | 0.7391     | 0.6448                   | 0.3113      |
| Information indices – knn (2)           | 0.9516             | 0.7273             | 0.9143     | 0.8394                   | 0.1415      |
| Information indices – knn (1) over      | 0.8226             | 0.7955             | 0.7609     | 0.8090                   | 0.1887      |
| Information indices – knn (1) smote     | 0.9194             | 0.7273             | 0.8649     | 0.8233                   | 0.1604      |
| 2D-matrix – RF (1)                      | 0.9032             | 0.4091             | 0.7500     | 0.6562                   | 0.3019      |
| 2D-matrix – RF (2)                      | 0.8871             | 0.4545             | 0.7407     | 0.6708                   | 0.2925      |
| 2D-matrix – RF (1) over                 | 0.8871             | 0.4773             | 0.7500     | 0.6822                   | 0.2830      |
| 2D-matrix RF (1) smote                  | 0.8548             | 0.5000             | 0.7097     | 0.6774                   | 0.2925      |
| 2D-matrix BST (1)                       | 0.6774             | 0.5682             | 0.5556     | 0.6228                   | 0.3679      |
| 2D-matrix BST (2)                       | 0.7097             | 0.6591             | 0.6170     | 0.6844                   | 0.3113      |
| 2D-matrix BST (2) over                  | 0.7258             | 0.7045             | 0.6458     | 0.7152                   | 0.2830      |
| 2D-matrix BST (1) smote                 | 0.7097             | 0.7273             | 0.6400     | 0.7185                   | 0.2830      |
| 2D-matrix SVM (1)                       | 0.8226             | 0.6591             | 0.7250     | 0.7408                   | 0.2453      |
| 2D-matrix SVM (2)                       | 0.8226             | 0.7045             | 0.7381     | 0.7636                   | 0.2264      |
| 2D-matrix SVM (2) over                  | 0.7903             | 0.7273             | 0.7111     | 0.7588                   | 0.2358      |
| 2D-matrix SVM (2) smote                 | 0.7419             | 0.7727             | 0.6800     | 0.7573                   | 0.2453      |
| 2D-matrix knn (1)                       | 0.8548             | 0.5455             | 0.7273     | 0.7001                   | 0.2736      |
| 2D-matrix knn (2)                       | 0.8065             | 0.5455             | 0.6667     | 0.6760                   | 0.3019      |
| 2D-matrix knn (1) over                  | 0.6452             | 0.7955             | 0.6140     | 0.7203                   | 0.2925      |
| 2D-matrix knn (2) smote                 | 0.7903             | 0.7045             | 0.7045     | 0.7474                   | 0.2453      |
| 2D-autocorrelation - RF (1)             | 0.9355             | 0.3864             | 0.8095     | 0.6609                   | 0.2924      |
| 2D-autocorrelation - RF (2)             | 0.9677             | 0.4091             | 0.9000     | 0.6884                   | 0.2642      |
| 2D-autocorrelation - RF (2) over        | 0.9032             | 0.5000             | 0.7857     | 0.7016                   | 0.2642      |
| 2D-autocorrelation - RF (2) smote       | 0.9194             | 0.4773             | 0.8077     | 0.6983                   | 0.2642      |
| 2D-autocorrelation - BST (1)            | 0.7097             | 0.6364             | 0.6087     | 0.6730                   | 0.3208      |

| Model                              | Specificity | Sensitivity | PPV    | Balanced accuracy | MMCE   |
|------------------------------------|-------------|-------------|--------|-------------------|--------|
| 2D-autocorrelation - BST (2)       | 0.6613      | 0.6136      | 0.5625 | 0.6375            | 0.3585 |
| 2D-autocorrelation - BST (2) over  | 0.6613      | 0.6364      | 0.5714 | 0.6488            | 0.3491 |
| 2D-autocorrelation - BST (2) smote | 0.5968      | 0.6591      | 0.5370 | 0.6279            | 0.3774 |
| 2D-autocorrelation - SVM (1)       | 0.6935      | 0.6591      | 0.6042 | 0.6763            | 0.3208 |
| 2D-autocorrelation - SVM (2)       | 0.8226      | 0.6364      | 0.7179 | 0.7295            | 0.2547 |
| 2D-autocorrelation - SVM (2) over  | 0.6935      | 0.7045      | 0.6200 | 0.6990            | 0.3019 |
| 2D-autocorrelation - SVM (2) smote | 0.7258      | 0.6818      | 0.6383 | 0.7038            | 0.2925 |
| 2D-autocorrelation - knn (1)       | 0.7903      | 0.6591      | 0.6905 | 0.7247            | 0.2642 |
| 2D-autocorrelation - knn (2)       | 0.8226      | 0.7727      | 0.7556 | 0.7977            | 0.1981 |
| 2D-autocorrelation - knn (2) over  | 0.7419      | 0.8182      | 0.6923 | 0.7801            | 0.2264 |
| 2D-autocorrelation - knn (2) smote | 0.7903      | 0.7500      | 0.7174 | 0.7702            | 0.2264 |
| Burden eigenvalues – RF (1)        | 0.9355      | 0.5227      | 0.8518 | 0.7291            | 0.2358 |
| Burden eigenvalues – RF (2)        | 0.9516      | 0.4773      | 0.8750 | 0.7144            | 0.2453 |
| Burden eigenvalues – RF (2) over   | 0.9516      | 0.5909      | 0.8966 | 0.7713            | 0.1981 |
| Burden eigenvalues – RF (2) smote  | 0.9355      | 0.5682      | 0.8621 | 0.7518            | 0.2170 |
| Burden eigenvalues – bst (1)       | 0.7581      | 0.6818      | 0.6667 | 0.7199            | 0.2736 |
| Burden eigenvalues – bst (2)       | 0.8226      | 0.7045      | 0.7381 | 0.7636            | 0.2264 |
| Burden eigenvalues – bst (2) over  | 0.7742      | 0.7045      | 0.6889 | 0.7394            | 0.2547 |
| Burden eigenvalues – bst (2) smote | 0.8226      | 0.7273      | 0.7442 | 0.7749            | 0.2170 |
| Burden eigenvalues – SVM (1)       | 0.7097      | 0.6591      | 0.6170 | 0.6844            | 0.2830 |
| Burden eigenvalues – SVM (2)       | 0.7581      | 0.6591      | 0.6591 | 0.7086            | 0.2830 |
| Burden eigenvalues – SVM (2) over  | 0.6290      | 0.7273      | 0.5818 | 0.6782            | 0.3302 |
| Burden eigenvalues – SVM (2) smote | 0.6290      | 0.7273      | 0.5818 | 0.6782            | 0.3302 |
| Burden eigenvalues – knn (1)       | 0.8226      | 0.5909      | 0.7027 | 0.7067            | 0.2736 |
| Burden eigenvalues – knn (2)       | 0.8548      | 0.6364      | 0.7568 | 0.7456            | 0.2358 |
| Burden eigenvalues – knn (1) over  | 0.7419      | 0.7045      | 0.6596 | 0.7232            | 0.2736 |
| Burden eigenvalues – knn (1) smote | 0.7097      | 0.6818      | 0.6250 | 0.6957            | 0.3019 |
| P-VSA-like – RF (1)                | 0.9783      | 0.6562      | 0.9545 | 0.8173            | 0.1538 |
| P-VSA-like – RF (2)                | 0.9783      | 0.6875      | 0.9565 | 0.8329            | 0.1410 |
| P-VSA-like – RF (2) over           | 0.9783      | 0.7812      | 0.9615 | 0.8798            | 0.1026 |
| P-VSA-like – RF (2) smote          | 0.9783      | 0.9062      | 0.9667 | 0.9423            | 0.0513 |
| P-VSA-like – BST (1)               | 0.7581      | 0.6591      | 0.6591 | 0.7086            | 0.2830 |
| P-VSA-like – BST (2)               | 0.7419      | 0.5682      | 0.6098 | 0.6551            | 0.3302 |
| P-VSA-like – BST (2) over          | 0.7742      | 0.6136      | 0.6585 | 0.6939            | 0.2925 |
| P-VSA-like – BST (2) smote         | 0.6935      | 0.6591      | 0.6042 | 0.6763            | 0.3208 |
| P-VSA-like – SVM (1)               | 0.8871      | 0.5909      | 0.7879 | 0.7390            | 0.2358 |
| P-VSA-like – SVM (2)               | 0.7903      | 0.6818      | 0.6977 | 0.7361            | 0.2547 |
| P-VSA-like – SVM (1) over          | 0.7097      | 0.7273      | 0.6400 | 0.7185            | 0.2830 |
| P-VSA-like – SVM (1) smote         | 0.7581      | 0.7273      | 0.6809 | 0.7427            | 0.2547 |
| P-VSA-like – knn (1)               | 0.8387      | 0.6136      | 0.7297 | 0.7262            | 0.2547 |
| P-VSA-like – knn (2)               | 0.8710      | 0.6364      | 0.7778 | 0.7537            | 0.2264 |
| P-VSA-like – knn (1) over          | 0.7903      | 0.7045      | 0.7045 | 0.7474            | 0.2453 |
| P-VSA-like – knn (1) smote         | 0.8226      | 0.6591      | 0.7250 | 0.7408            | 0.2453 |
| Eta indices – RF (1)               | 0.8710      | 0.4091      | 0.6923 | 0.6400            | 0.3208 |
| Eta indices – RF (2)               | 0.9032      | 0.4318      | 0.7600 | 0.6675            | 0.2924 |
| Eta indices – RF (2) over          | 0.8710      | 0.4318      | 0.7037 | 0.6514            | 0.3113 |
| Eta indices – RF (2) smote         | 0.8710      | 0.5455      | 0.7500 | 0.7082            | 0.2642 |
| Eta indices – BST (1)              | 0.7419      | 0.6818      | 0.6522 | 0.7119            | 0.2830 |
| Eta indices – BST (2)              | 0.6774      | 0.5455      | 0.5455 | 0.6114            | 0.3774 |
| Eta indices – BST (2) over         | 0.6290      | 0.7045      | 0.5741 | 0.6668            | 0.3396 |
| Eta indices – BST (2) smote        | 0.6935      | 0.6818      | 0.6122 | 0.6877            | 0.3113 |

| <b>Model</b>                   | <b>Specificity</b> | <b>Sensitivity</b> | <b>PPV</b> | <b>Balanced accuracy</b> | <b>MMCE</b> |
|--------------------------------|--------------------|--------------------|------------|--------------------------|-------------|
| Eta indices – SVM (1)          | 0.8065             | 0.6364             | 0.7000     | 0.7214                   | 0.2642      |
| Eta indices – SVM (2)          | 0.8387             | 0.6136             | 0.7297     | 0.7262                   | 0.2547      |
| Eta indices – SVM (1) over     | 0.7258             | 0.7273             | 0.6531     | 0.7265                   | 0.2736      |
| Eta indices – SVM (1) smote    | 0.7742             | 0.7273             | 0.6957     | 0.7507                   | 0.2453      |
| Eta indices – knn (1)          | 0.7742             | 0.5000             | 0.6111     | 0.6371                   | 0.3396      |
| Eta indices – knn (2)          | 0.7903             | 0.5909             | 0.6667     | 0.6906                   | 0.2925      |
| Eta indices – knn (1) over     | 0.7097             | 0.5682             | 0.5814     | 0.6389                   | 0.3491      |
| Eta indices – knn (1) smote    | 0.7097             | 0.6136             | 0.6000     | 0.6617                   | 0.3302      |
| Edge adjacency – RF (1)        | 0.9839             | 0.4545             | 0.9524     | 0.7192                   | 0.2358      |
| Edge adjacency – RF (2)        | 0.9839             | 0.3864             | 0.9444     | 0.6851                   | 0.2642      |
| Edge adjacency – RF (1) over   | 0.9516             | 0.4545             | 0.8696     | 0.7031                   | 0.2547      |
| Edge adjacency – RF (1) smote  | 0.8710             | 0.4091             | 0.6923     | 0.6400                   | 0.3208      |
| Edge adjacency – BST (1)       | 0.7097             | 0.7955             | 0.6604     | 0.7526                   | 0.2547      |
| Edge adjacency – BST (2)       | 0.9023             | 0.6364             | 0.8235     | 0.7698                   | 0.2076      |
| Edge adjacency – BST (1) over  | 0.7419             | 0.7727             | 0.6800     | 0.7573                   | 0.2453      |
| Edge adjacency – BST (1) smote | 0.6774             | 0.7500             | 0.6226     | 0.7137                   | 0.2925      |
| Edge adjacency – SVM (1)       | 0.9194             | 0.5682             | 0.8333     | 0.7438                   | 0.2264      |
| Edge adjacency – SVM (2)       | 0.9355             | 0.5454             | 0.8571     | 0.7405                   | 0.2264      |
| Edge adjacency – SVM (1) over  | 0.9023             | 0.6364             | 0.8235     | 0.7698                   | 0.2076      |
| Edge adjacency – SVM (1) smote | 0.8548             | 0.6364             | 0.7568     | 0.7456                   | 0.2358      |
| Edge adjacency – knn (1)       | 0.8387             | 0.6136             | 0.7297     | 0.7262                   | 0.2547      |
| Edge adjacency – knn (2)       | 0.8710             | 0.5909             | 0.7647     | 0.7309                   | 0.2453      |
| Edge adjacency – knn (1) over  | 0.8226             | 0.6136             | 0.7105     | 0.7181                   | 0.2642      |
| Edge adjacency – knn (1) smote | 0.8065             | 0.6591             | 0.7073     | 0.7328                   | 0.2547      |
| Global – RF (1)                | 0.9032             | 0.3864             | 0.7391     | 0.6448                   | 0.3113      |
| Global – RF (2)                | 0.8548             | 0.5000             | 0.7097     | 0.6774                   | 0.2925      |
| Global – RF (1) over           | 0.8387             | 0.4318             | 0.6552     | 0.6353                   | 0.3302      |
| Global – RF (1) smote          | 0.8226             | 0.4773             | 0.6562     | 0.6499                   | 0.3208      |
| Global – BST (1)               | 0.9194             | 0.8636             | 0.8837     | 0.8915                   | 0.1038      |
| Global – BST (2)               | 0.8387             | 0.4773             | 0.6774     | 0.6580                   | 0.3113      |
| Global – BST (1) over          | 0.8871             | 0.9318             | 0.8542     | 0.9095                   | 0.0943      |
| Global – BST (1) smote         | 0.9032             | 0.9318             | 0.8723     | 0.9175                   | 0.0849      |
| Global – SVM (1)               | 0.9355             | 0.7273             | 0.8889     | 0.8314                   | 0.1509      |
| Global – SVM (2)               | 0.8387             | 0.6591             | 0.7436     | 0.7489                   | 0.2358      |
| Global – SVM (1) over          | 0.8871             | 0.7727             | 0.8293     | 0.8299                   | 0.1604      |
| Global – SVM (1) smote         | 0.8710             | 0.7500             | 0.8049     | 0.8105                   | 0.1792      |
| Global – knn (1)               | 0.9516             | 0.7727             | 0.9189     | 0.8622                   | 0.1226      |
| Global – knn (2)               | 0.8548             | 0.5682             | 0.7353     | 0.7115                   | 0.2642      |
| Global – knn (1) over          | 0.9032             | 0.9773             | 0.8775     | 0.9402                   | 0.0660      |
| Global – knn (1) smote         | 0.8871             | 0.7727             | 0.8293     | 0.8299                   | 0.1604      |
